# Supplementary material for: NKX2–1 expression as a prognostic marker in early-stage non-small-cell lung cancer
Source: Springer Nature journal article supplement (doi:10.1186/s12890-017-0542-z), 2017-12-01

Supplementary Figure 1

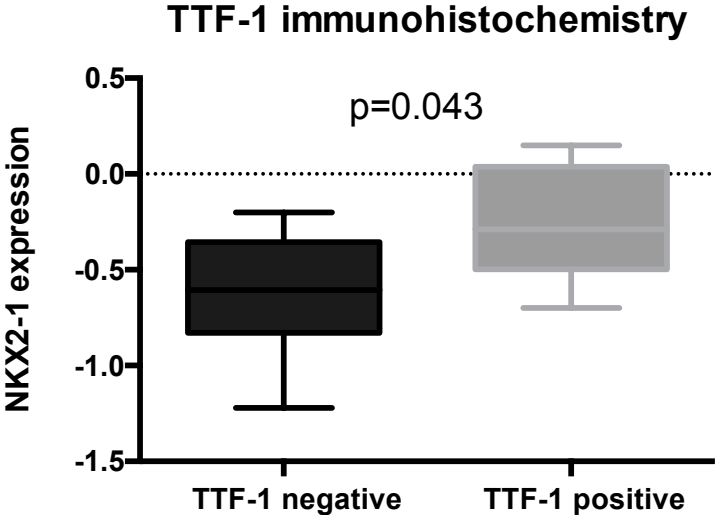

# Supplementary Figure 2

A

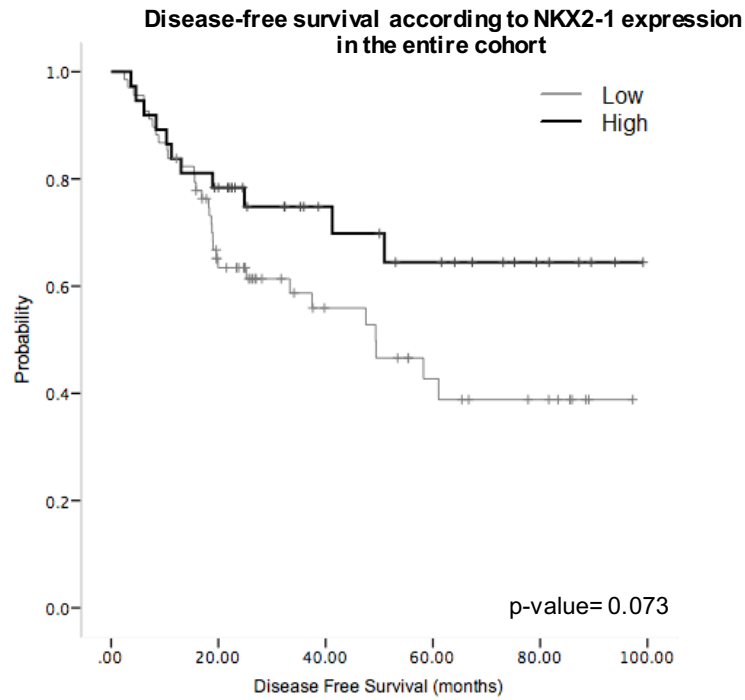

B

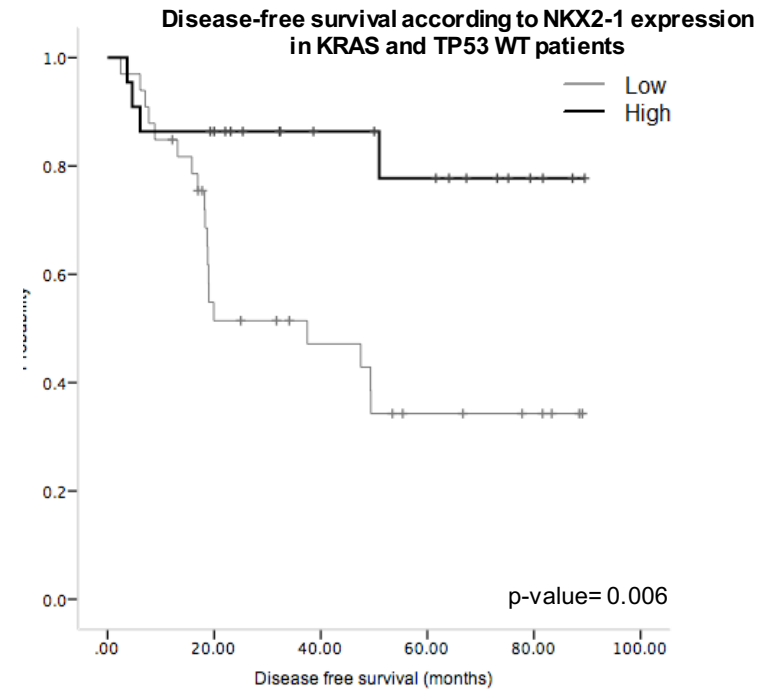

# Supplementary Figure 3

**A**

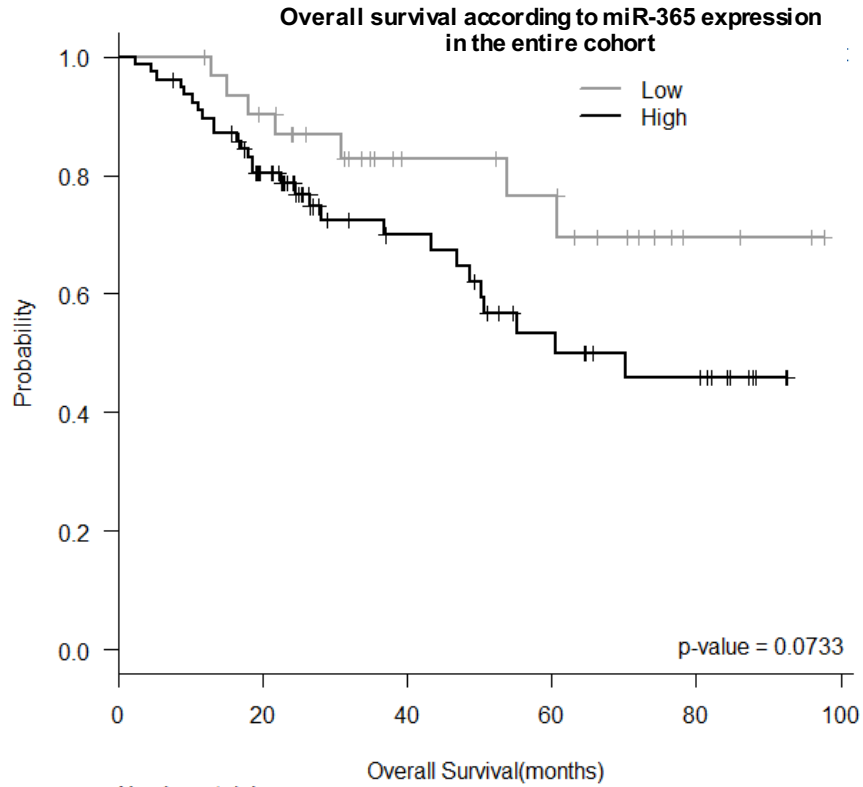

|      | Overall Survival(months) |    |    |    |    |     |
|------|--------------------------|----|----|----|----|-----|
|      | 0                        | 20 | 40 | 60 | 80 | 100 |
| Low  | 32                       | 27 | 14 | 12 | 3  | 0   |
| High | 78                       | 54 | 27 | 16 | 11 | 0   |

**B**

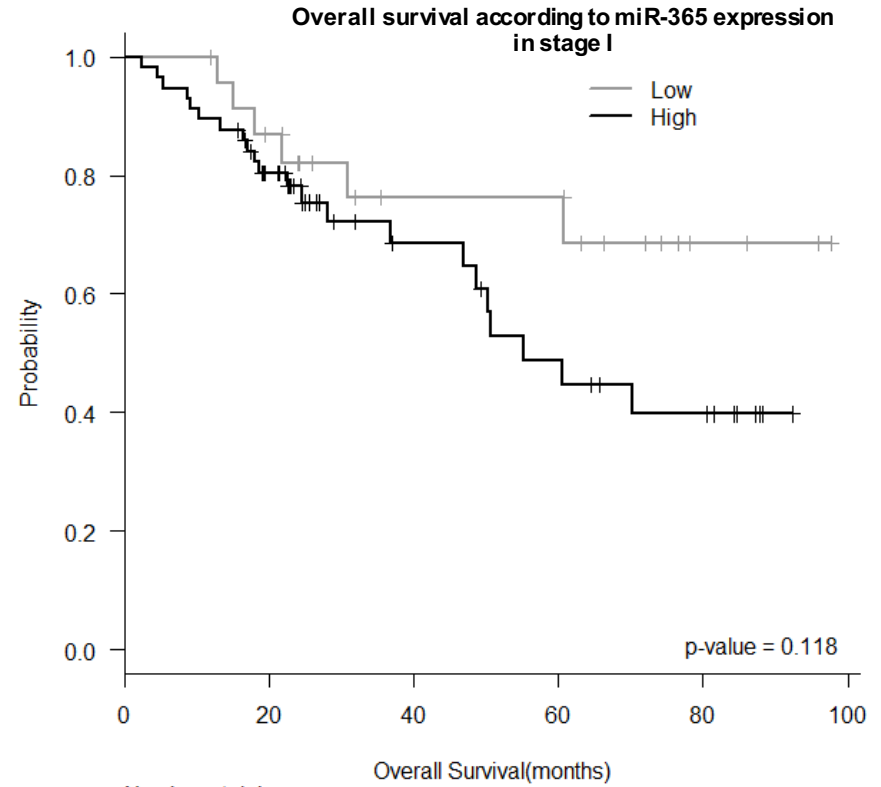

|      | Overall Survival(months) |    |    |    |    |     |
|------|--------------------------|----|----|----|----|-----|
|      | 0                        | 20 | 40 | 60 | 80 | 100 |
| Low  | 24                       | 19 | 11 | 11 | 3  | 0   |
| High | 57                       | 39 | 18 | 12 | 8  | 0   |

# Supplementary Figure 4

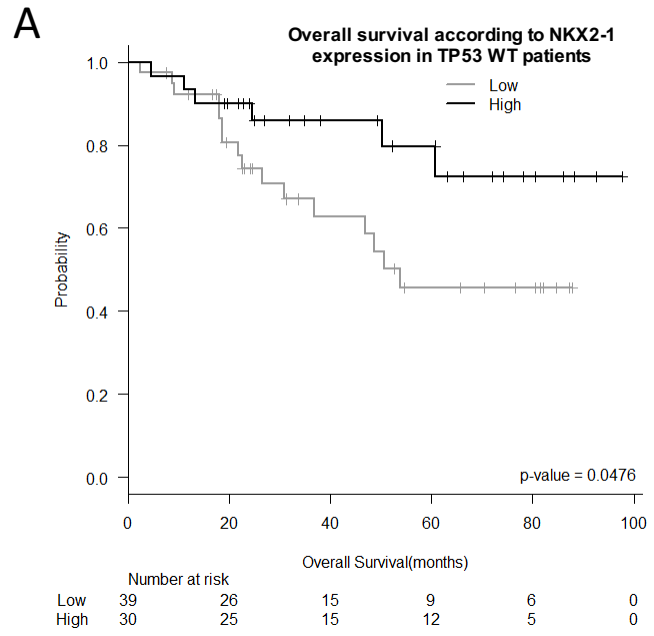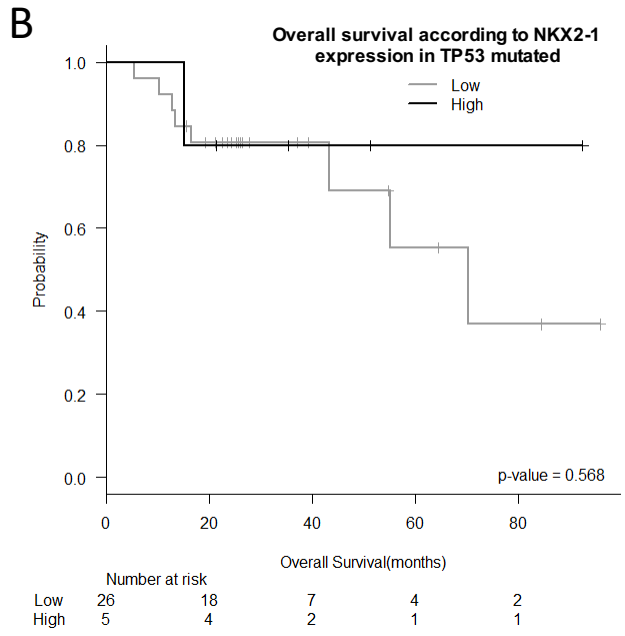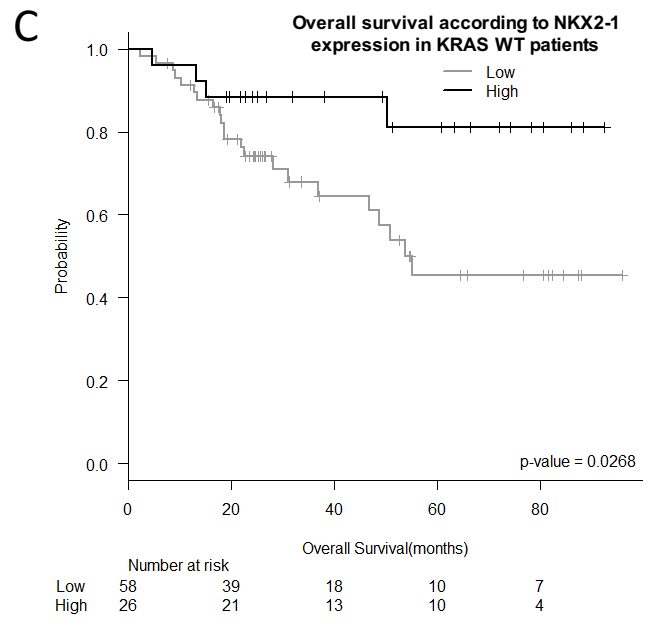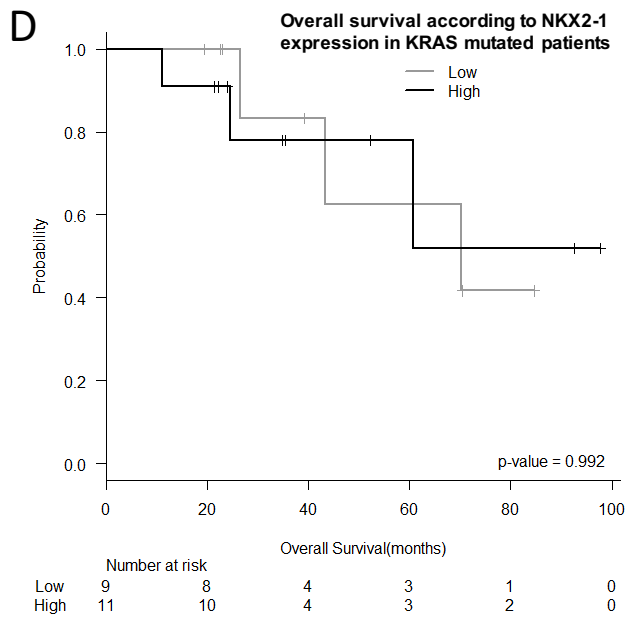

# Supplementary Figure 5

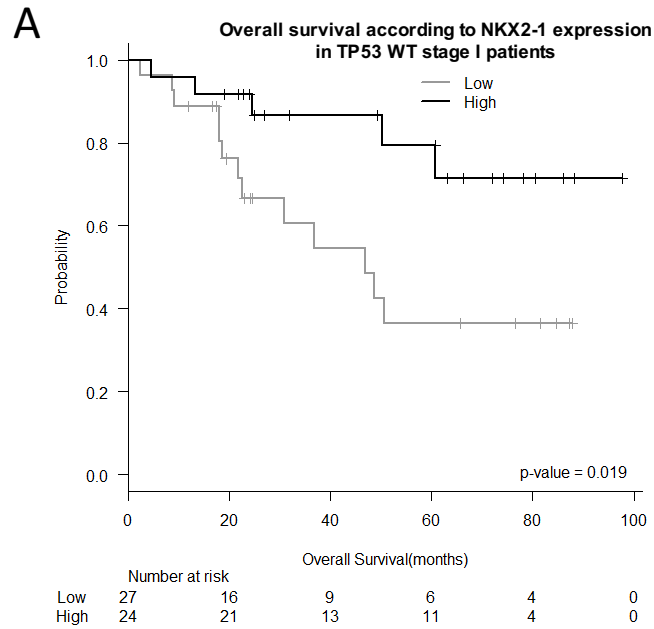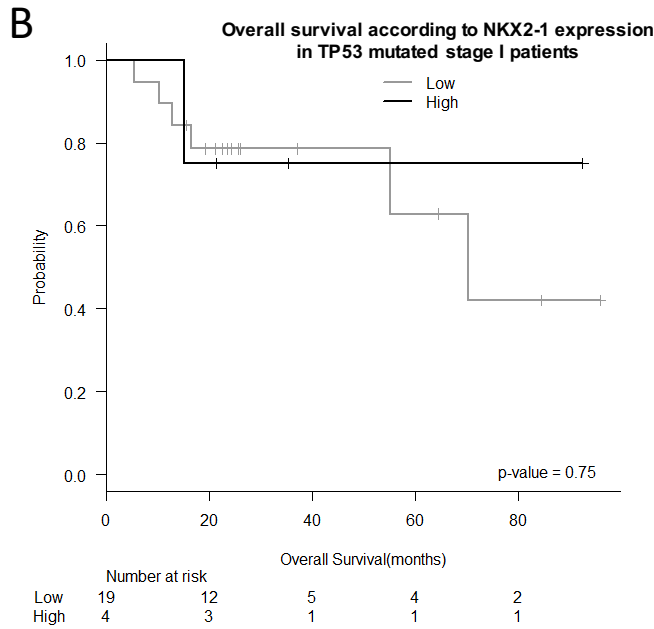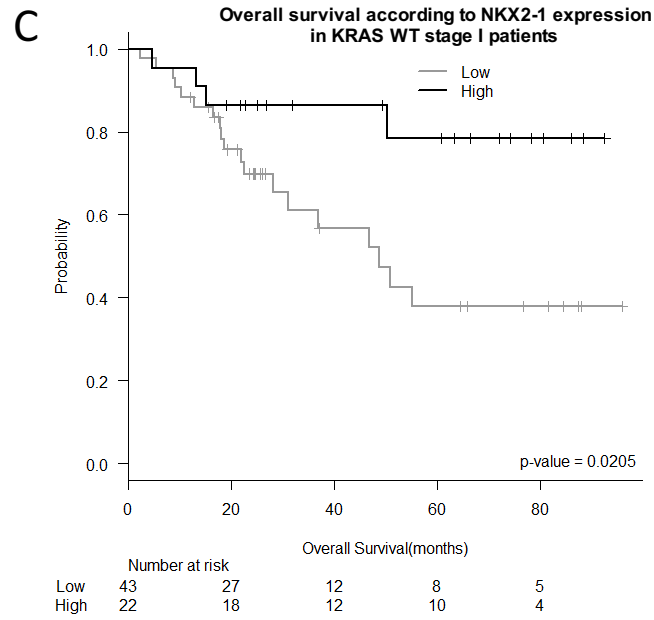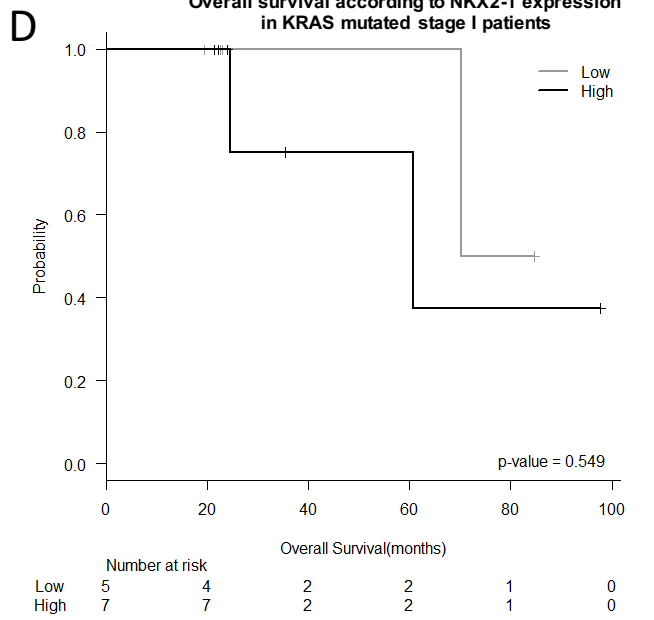

Supplement: MOESM1 [file 15304900]
